# Supplementary material for: Mitigating the Jahn–Teller distortion and phase transition in the P2-Na0.67Ni0.33Mn0.67O2 cathode through large Sr2+ ion substitution for improved performance
Source: Royal Society of Chemistry journal article supplement (doi:10.1039/d4ta02993c), 2024-01-01
Supplement: d4ta02993c1.pdf [file d4ta02993c1.pdf]

## **Supporting Information**

### **Mitigating Jahn-Teller Distortion and Phase Transition in P2- Na<sub>0.67</sub>Ni<sub>0.33</sub>Mn<sub>0.67</sub>O<sub>2</sub> Cathode through Large Sr<sup>2+</sup> ion Substitution for Improved Performance**

Xilong Zhang, Fei Xie, Xuejie Wang, Tao Liu, Liuyang Zhang\*, Jiaguo Yu\*

*Laboratory of Solar Fuel, Faculty of Materials Science and Chemistry, China  
University of Geosciences, 68 Jincheng Street, Wuhan, 430078, P. R. China.*

\* Corresponding author.

E-mail: [zhangliuyang@cug.edu.cn](mailto:zhangliuyang@cug.edu.cn); [yujiaguo93@cug.edu.cn](mailto:yujiaguo93@cug.edu.cn) (J. Yu)

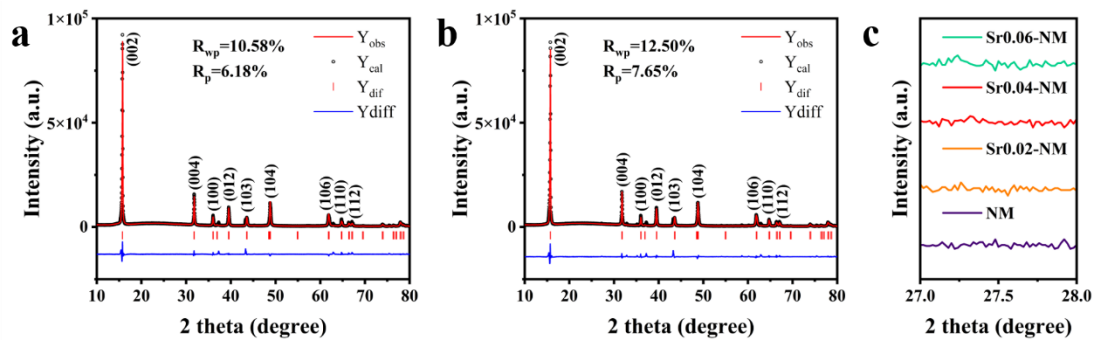

**Figure S1.** Rietveld refinement of the XRD patterns for (a) Sr0.02-NM and (b) Sr0.06-NM. (c)

XRD pattern for the samples at the range of 27~28 degrees.

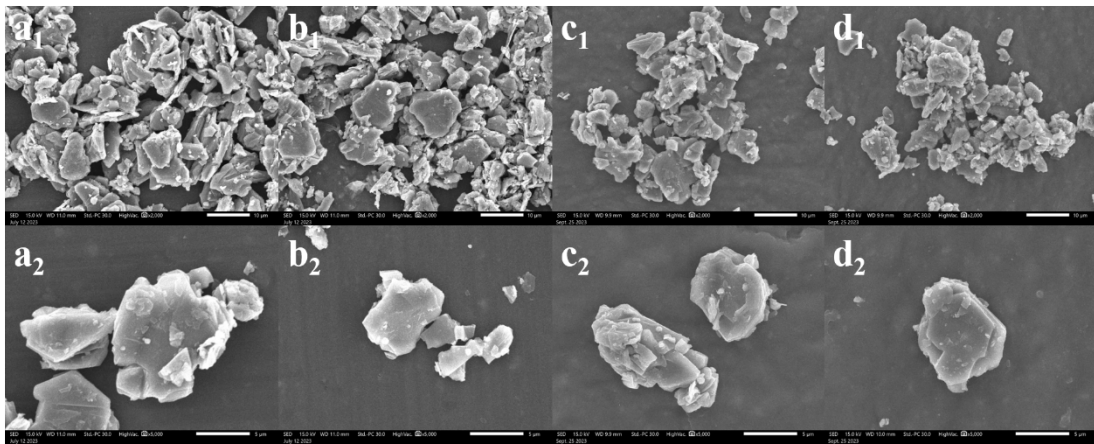

**Figure S2.** SEM images of (a) NM, (b) Sr0.02-NM, (c) Sr0.04-NM, and (d) Sr0.06-NM.

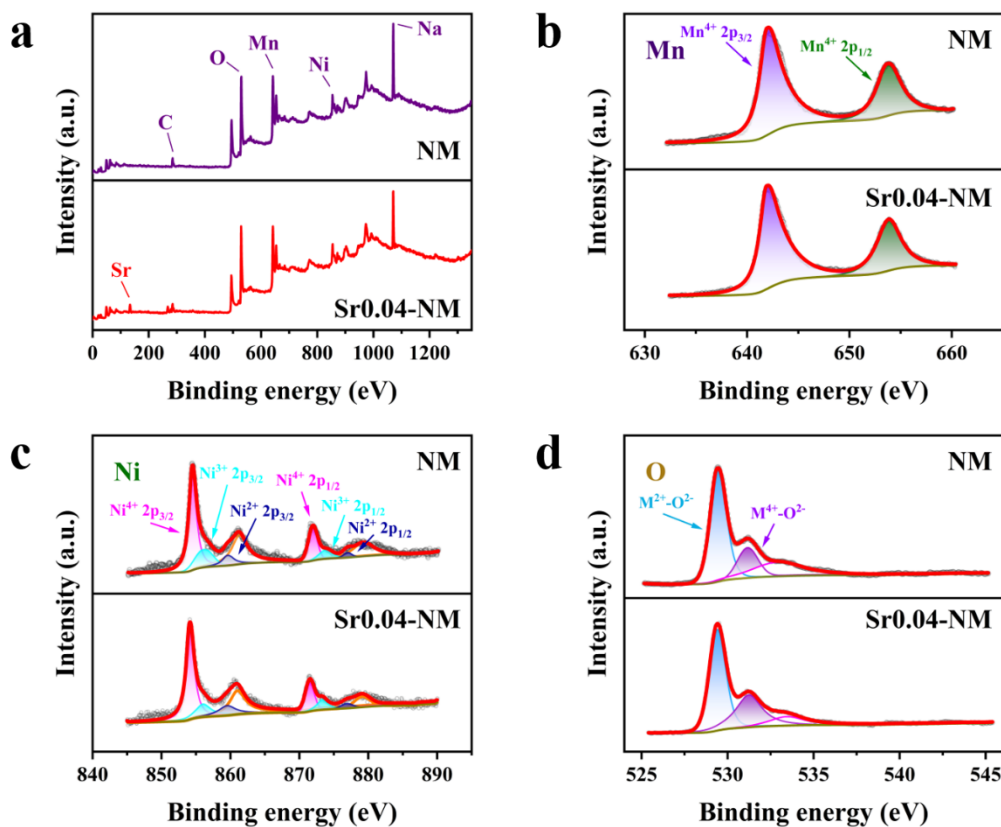

Figure S3. XPS results of powder samples. (a) survey spectrum. Fitting results of (b) manganese, (c) nickel, and (d) oxygen.

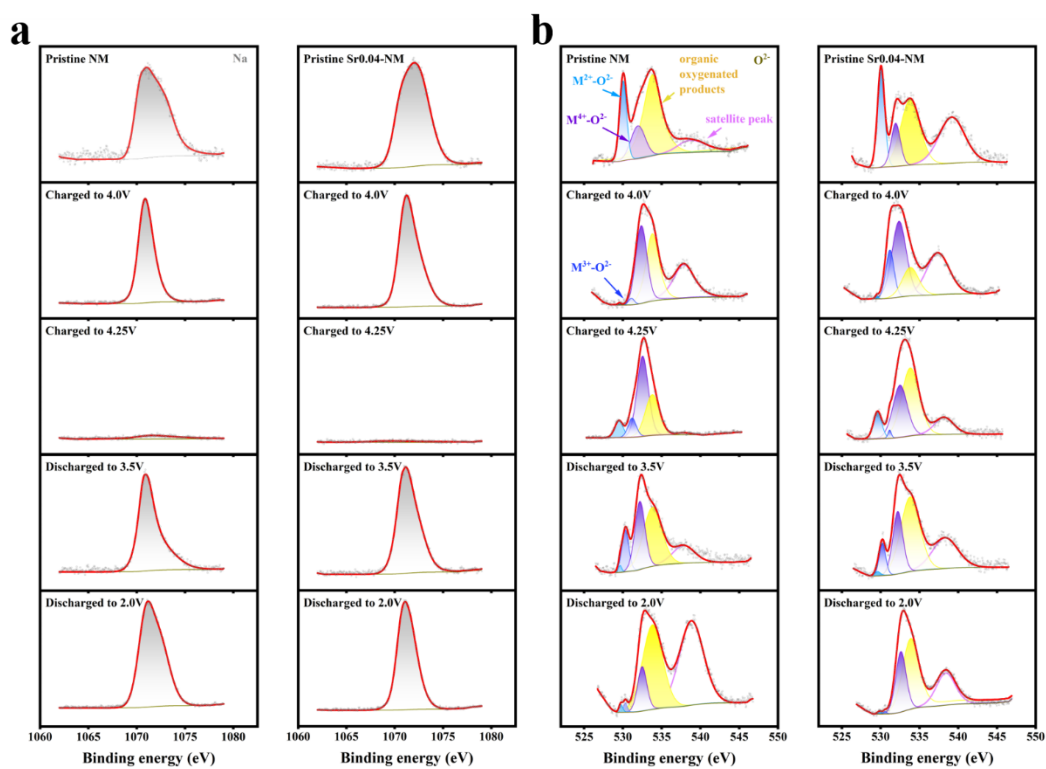

**Figure S4.** Ex-situ XPS patterns for (a) sodium and (b) oxygen elements at five electrochemical states.

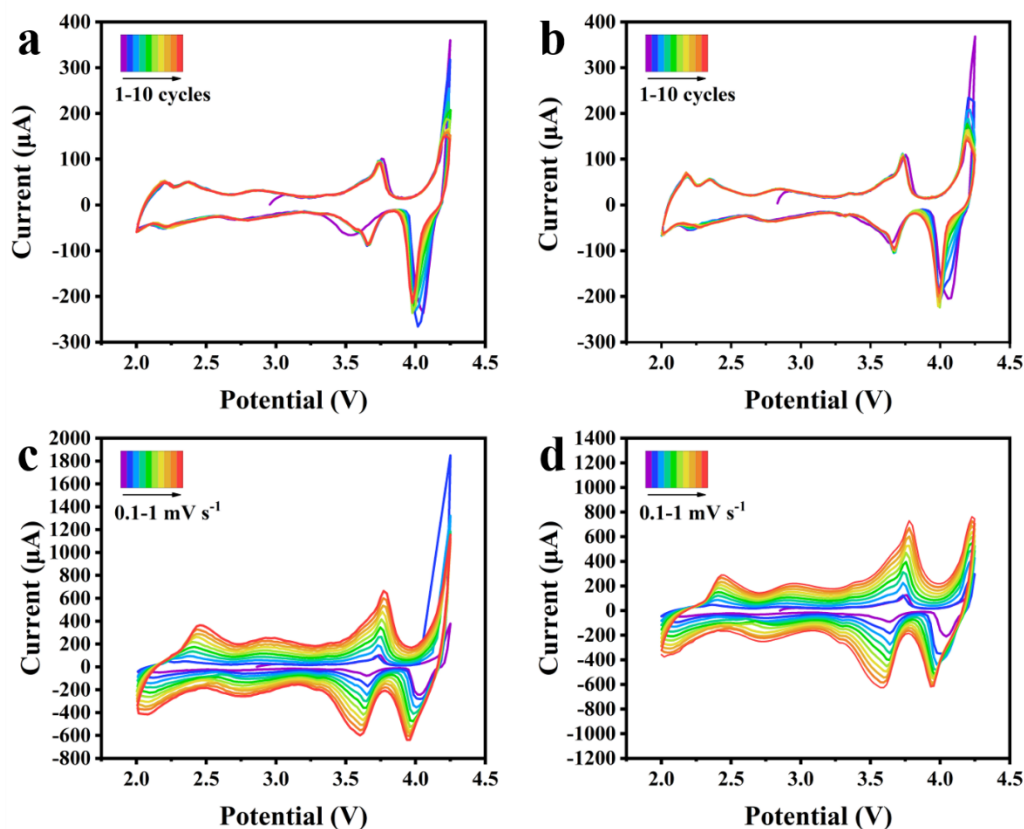

**Figure S5.** Multi-cycle cyclic voltammetry curves of (a) Sr0.02-NM, (b) Sr0.06-NM, and multi-scan-rate cyclic voltammetry curves of (c) Sr0.02-NM, (d) Sr0.06-NM.

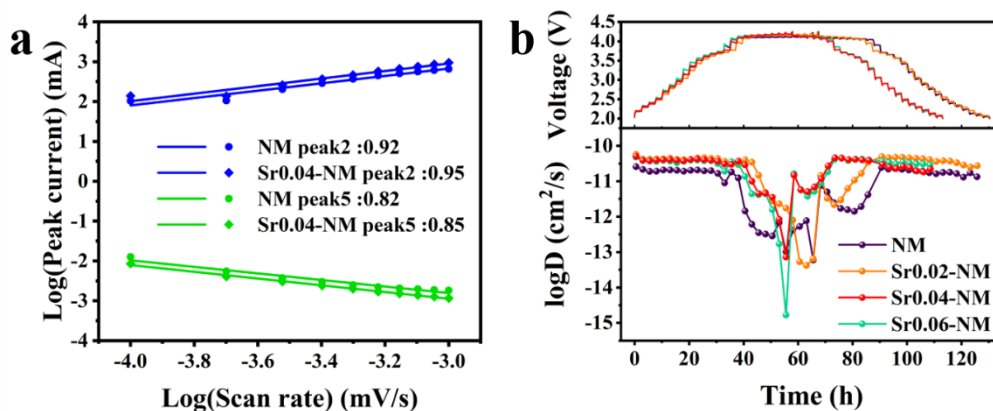

**Figure S6.** The peak currents of the (a) peaks 2 and 5 of NM and Sr0.04-NM, (b) GITT test (time vs.  $\text{log D}$ ).

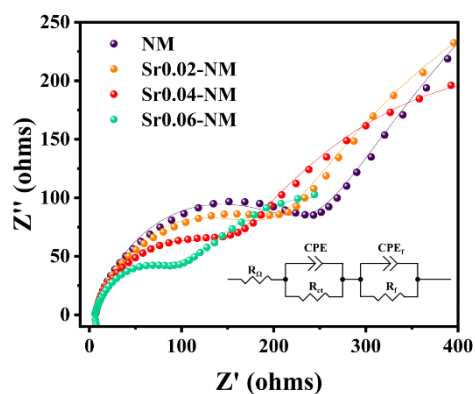

**Figure S7.** The Nyquist plots of the electrochemical impedance spectroscopies test with an equivalent circuit embedded.

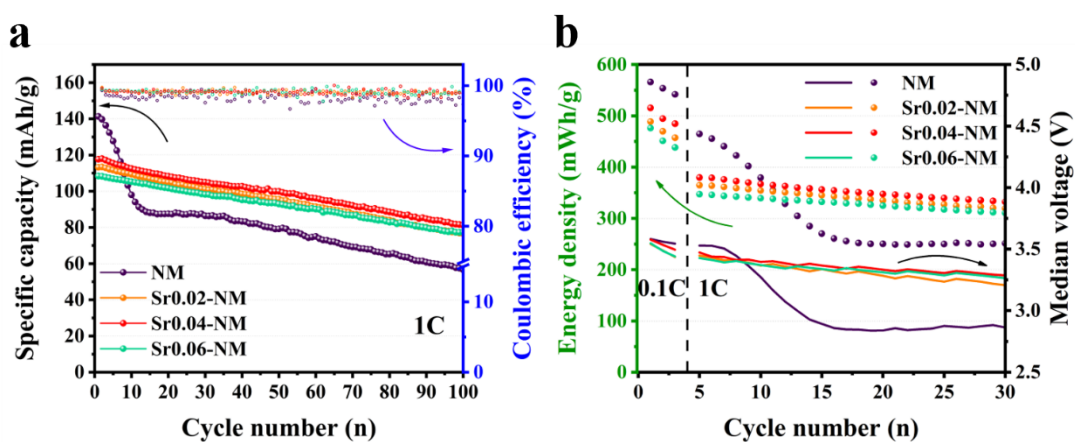

**Figure S8.** Electrochemistry performance. (a) Cycle performance of samples at 1 C between 2.0 V and 4.25 V. (b) Energy density and median voltage of the electrodes.

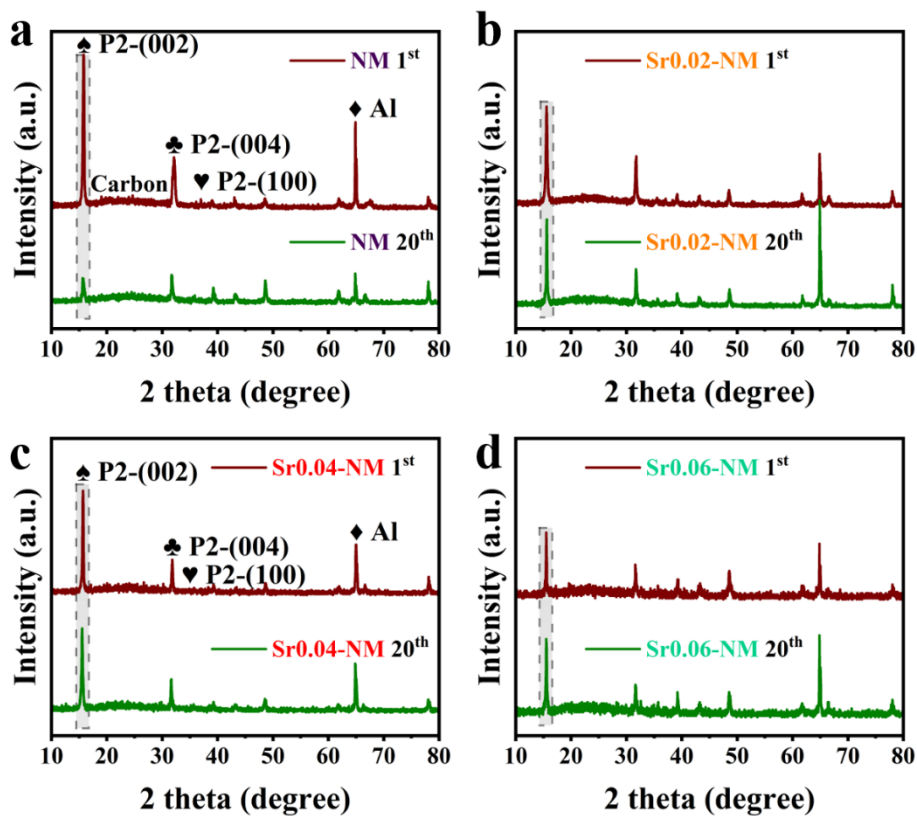

**Figure S9.** The XRD patterns of the electrodes before and after 20 cycles at 1 C rate for NM and Sr0.04-NM.

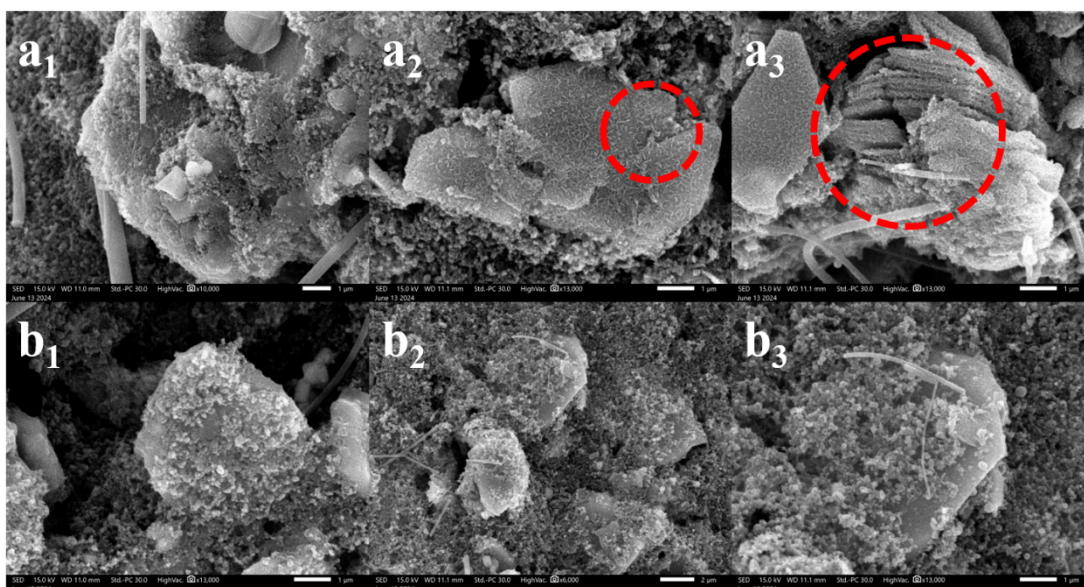

**Figure S10.** SEM images of the electrodes for (a) NM and (b) Sr0.04-NM. (a<sub>1</sub>) and (b<sub>1</sub>) are the images of pristine electrodes before testing. (a<sub>2</sub>), (a<sub>3</sub>), (b<sub>2</sub>), and (b<sub>3</sub>) belong to the electrodes after 20 cycles at a 5 C current rate.



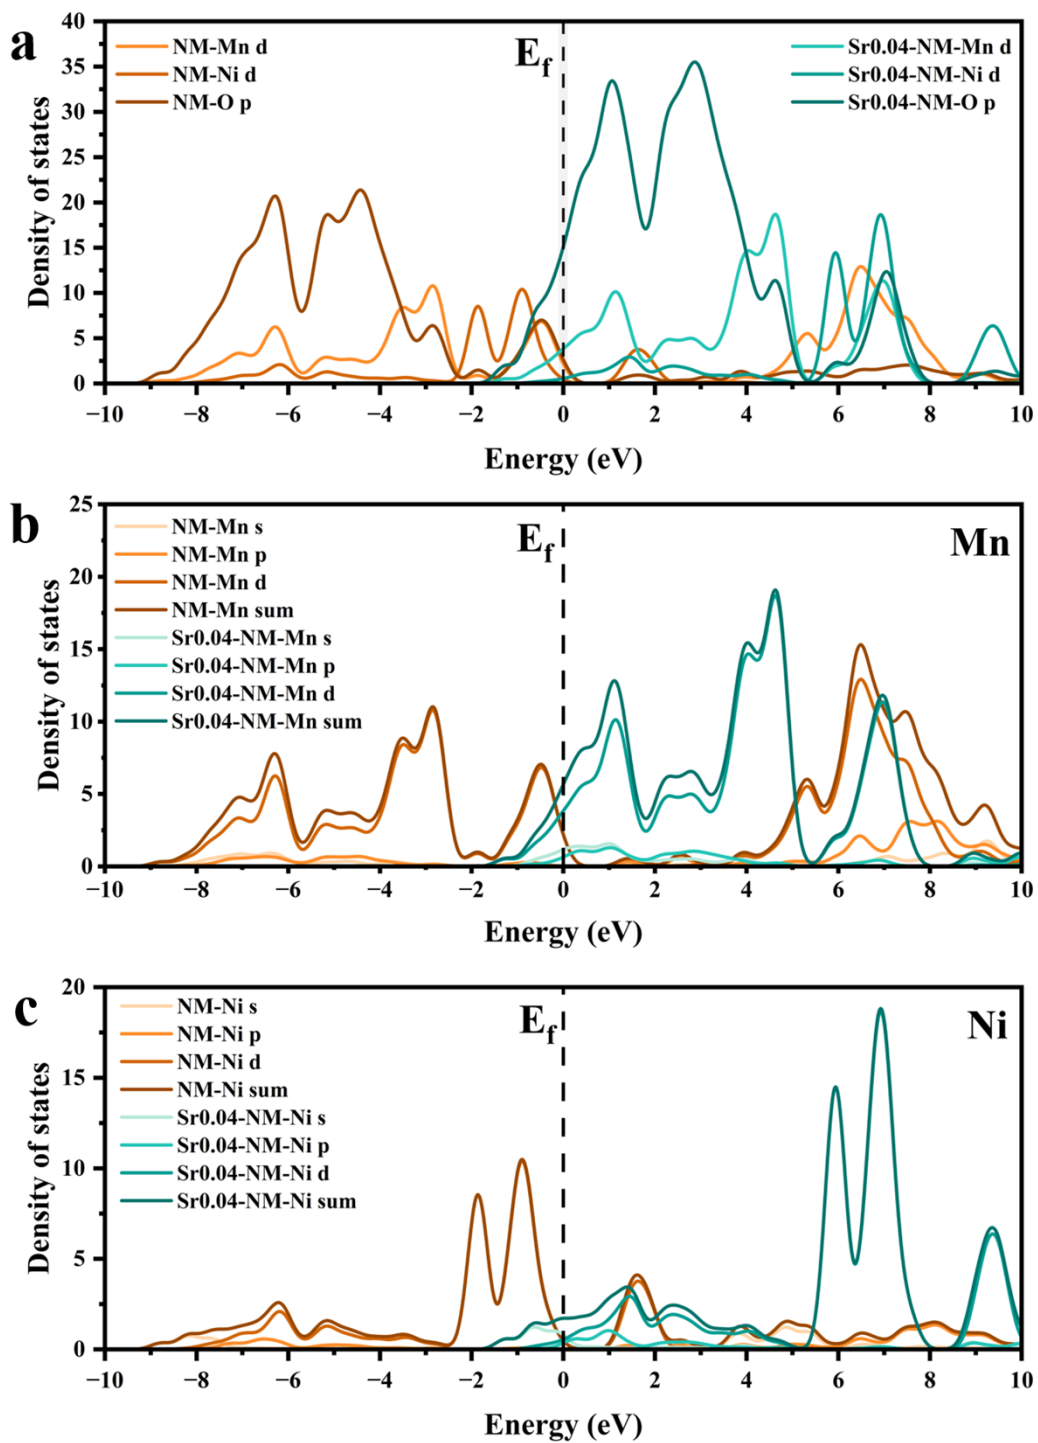

**Figure S11.** DFT calculations of NM and Sr0.04-NM. (a) The total density of states and the pDOS of (b) manganese and (c) nickel.

**Table S1.** The crystallographic results of NM from XRD refinement.

| Space group = $P6_3/mmc$     |                  | $R_p = 6.16\%$      |        | $R_{wp} = 10.65\%$             |           |        |
|------------------------------|------------------|---------------------|--------|--------------------------------|-----------|--------|
| $a$ (Å) = $b$ (Å) = 2.878780 |                  | $c$ (Å) = 11.270700 |        | $V$ (Å <sup>3</sup> ) = 80.902 |           |        |
| Atom                         | Wyckoff position | x                   | y      | z                              | $U_{iso}$ | Occ.   |
| O                            | 4f               | 0.6667              | 0.3333 | 0.0878                         | 0.00923   | 1.0473 |
| Na_f                         | 2b               | 0.0000              | 0.0000 | 0.2500                         | 0.14409   | 0.5085 |
| Na_e                         | 2d               | 0.3333              | 0.6667 | 0.7500                         | 0.12125   | 0.7670 |
| Ni                           | 2a               | 0.0000              | 0.0000 | 0.0000                         | 0.14846   | 0.3199 |
| Mn                           | 2a               | 0.0000              | 0.0000 | 0.0000                         | -0.03354  | 0.7306 |

**Table S2.** The crystallographic results of Sr0.02-NM from XRD refinement.

| Space group = $P6_3/mmc$     |                  | $R_p = 6.18\%$      |        | $R_{wp} = 10.58\%$             |           |        |
|------------------------------|------------------|---------------------|--------|--------------------------------|-----------|--------|
| $a$ (Å) = $b$ (Å) = 2.879209 |                  | $c$ (Å) = 11.263156 |        | $V$ (Å <sup>3</sup> ) = 80.861 |           |        |
| Atom                         | Wyckoff position | x                   | y      | z                              | $U_{iso}$ | Occ.   |
| O                            | 4f               | 0.6667              | 0.3333 | 0.091788                       | -0.00164  | 0.8581 |
| Na_f                         | 2b               | 0.0000              | 0.0000 | 0.2500                         | 0.06815   | 0.0681 |
| Na_e                         | 2d               | 0.3333              | 0.6667 | 0.7500                         | 0.04325   | 0.3984 |
| Ni                           | 2a               | 0.0000              | 0.0000 | 0.0000                         | 0.01514   | 0.3363 |
| Mn                           | 2a               | 0.0000              | 0.0000 | 0.0000                         | 0.00938   | 0.6668 |
| Sr_f                         | 2b               | 0.0000              | 0.0000 | 0.2500                         | 0.06544   | 0.0067 |
| Sr_e                         | 2d               | 0.3333              | 0.6667 | 0.7500                         | 0.05310   | 0.0133 |

**Table S3.** The crystallographic results of Sr0.04-NM from XRD refinement.



| <b>Space group = <math>P6_3/mmc</math></b>                |                         | <b><math>R_p = 6.76\%</math></b>      |          |          | <b><math>R_{wp} = 11.30\%</math></b>           |             |
|-----------------------------------------------------------|-------------------------|---------------------------------------|----------|----------|------------------------------------------------|-------------|
| <b><math>a</math> (Å) = <math>b</math> (Å) = 2.879814</b> |                         | <b><math>c</math> (Å) = 11.255483</b> |          |          | <b><math>V</math> (Å<sup>3</sup>) = 80.789</b> |             |
| <b>Atom</b>                                               | <b>Wyckoff position</b> | <b>x</b>                              | <b>y</b> | <b>z</b> | <b><math>U_{iso}</math></b>                    | <b>Occ.</b> |
| O                                                         | 4f                      | 0.6667                                | 0.3333   | 0.094207 | 0.02081                                        | 0.9573      |
| Na_f                                                      | 2b                      | 0.0000                                | 0.0000   | 0.2500   | 0.09217                                        | 0.3814      |
| Na_e                                                      | 2d                      | 0.3333                                | 0.6667   | 0.7500   | 0.13286                                        | 0.4986      |
| Ni                                                        | 2a                      | 0.0000                                | 0.0000   | 0.0000   | 0.02229                                        | 0.3220      |
| Mn                                                        | 2a                      | 0.0000                                | 0.0000   | 0.0000   | 0.00800                                        | 0.6529      |
| Sr_f                                                      | 2b                      | 0.0000                                | 0.0000   | 0.2500   | 0.12355                                        | 0.0131      |
| Sr_e                                                      | 2d                      | 0.3333                                | 0.6667   | 0.7500   | 0.02977                                        | 0.0267      |

**Table S4.** The crystallographic results of Sr0.06-NM from XRD refinement.

| <b>Space group = <math>P6_3/mmc</math></b>                |                         | <b><math>R_p = 7.82\%</math></b>      |          |          | <b><math>R_{wp} = 12.65\%</math></b>           |             |
|-----------------------------------------------------------|-------------------------|---------------------------------------|----------|----------|------------------------------------------------|-------------|
| <b><math>a</math> (Å) = <math>b</math> (Å) = 2.878919</b> |                         | <b><math>c</math> (Å) = 11.267184</b> |          |          | <b><math>V</math> (Å<sup>3</sup>) = 80.852</b> |             |
| <b>Atom</b>                                               | <b>Wyckoff position</b> | <b>x</b>                              | <b>y</b> | <b>z</b> | <b><math>U_{iso}</math></b>                    | <b>Occ.</b> |
| O                                                         | 4f                      | 0.6667                                | 0.3333   | 0.093658 | 0.03380                                        | 0.9029      |
| Na_f                                                      | 2b                      | 0.0000                                | 0.0000   | 0.2500   | 0.19654                                        | 0.3359      |
| Na_e                                                      | 2d                      | 0.3333                                | 0.6667   | 0.7500   | 0.17187                                        | 0.4603      |
| Ni                                                        | 2a                      | 0.0000                                | 0.0000   | 0.0000   | -0.04947                                       | 0.3300      |
| Mn                                                        | 2a                      | 0.0000                                | 0.0000   | 0.0000   | 0.15520                                        | 0.6659      |
| Sr_f                                                      | 2b                      | 0.0000                                | 0.0000   | 0.2500   | 0.01867                                        | 0.0298      |
| Sr_e                                                      | 2d                      | 0.3333                                | 0.6667   | 0.7500   | 0.08738                                        | 0.0314      |

**Table S5.** ICP-OES results. The mass and mole fraction of each element of NM and Sr0.04-NM.

| <b>Element</b> | <b>Designed<br/>mol ratio</b> | <b>wt%</b>      | <b>mol%</b>     | <b>Normalization</b> |
|----------------|-------------------------------|-----------------|-----------------|----------------------|
| <b>Na</b>      | <b>0.67</b>                   | <b>12.19131</b> | <b>0.530288</b> | <b>0.575234</b>      |
| <b>Ni</b>      | <b>0.33</b>                   | <b>14.27771</b> | <b>0.243261</b> | <b>0.263879</b>      |
| <b>Mn</b>      | <b>0.67</b>                   | <b>33.93238</b> | <b>0.617649</b> | <b>0.67</b>          |
| <b>Na</b>      | <b>0.67</b>                   | <b>12.21079</b> | <b>0.531135</b> | <b>0.566816</b>      |
| <b>Sr</b>      | <b>0.04</b>                   | <b>2.700095</b> | <b>0.030812</b> | <b>0.032882</b>      |
| <b>Ni</b>      | <b>0.33</b>                   | <b>14.62216</b> | <b>0.249129</b> | <b>0.265866</b>      |
| <b>Mn</b>      | <b>0.67</b>                   | <b>34.49133</b> | <b>0.627823</b> | <b>0.67</b>          |

**Table S6.** The fitting results of the electrochemical impedance spectroscopies.

| <b>Electrodes</b> | <b><math>R_{\Omega}</math></b> | <b><math>R_{ct}</math></b> |
|-------------------|--------------------------------|----------------------------|
| <b>NM</b>         | <b>6.075</b>                   | <b>221.2</b>               |
| <b>Sr0.02-NM</b>  | <b>6.095</b>                   | <b>184.3</b>               |
| <b>Sr0.04-NM</b>  | <b>6.323</b>                   | <b>129.8</b>               |
| <b>Sr0.06-NM</b>  | <b>5.85</b>                    | <b>87.39</b>               |

**Table S7.** The results of the XRD peak intensity in **Figure S8** are based on the diffraction peak of Al.

| <b>Electrodes</b> | <b>Pristine ratio to<br/>intensity of Al</b> | <b>Ratio of electrodes<br/>after 20 cycles</b> | <b>Retention</b> |
|-------------------|----------------------------------------------|------------------------------------------------|------------------|
| <b>NM</b>         | <b>1.73</b>                                  | <b>0.75</b>                                    | <b>43%</b>       |
| <b>Sr0.02-NM</b>  | <b>1.82</b>                                  | <b>0.83</b>                                    | <b>45%</b>       |
| <b>Sr0.04-NM</b>  | <b>2.08</b>                                  | <b>1.71</b>                                    | <b>82%</b>       |
| <b>Sr0.06-NM</b>  | <b>1.15</b>                                  | <b>0.94</b>                                    | <b>82%</b>       |

**Table S8.** Electrochemical properties of Ni/Mn-based cathodes under different voltage window

| Cathodes                                                                                                          | Voltage range (V) | Rate capacity                                  |                                                  | Cyclic stability                               |               |               | Ref.      |
|-------------------------------------------------------------------------------------------------------------------|-------------------|------------------------------------------------|--------------------------------------------------|------------------------------------------------|---------------|---------------|-----------|
|                                                                                                                   |                   | Maximum capacity (rate) (mAh g <sup>-1</sup> ) | High rate capacity (rate) (mAh g <sup>-1</sup> ) | Initial capacity (rate) (mAh g <sup>-1</sup> ) | Cycle numbers | Retention (%) |           |
| P2-Na <sub>0.59</sub> Sr <sub>0.04</sub> Ni <sub>0.33</sub> Mn <sub>0.67</sub> O <sub>2</sub>                     | 2.0-4.25          | 154.2<br>(0.1 C)                               | 68.3<br>(10 C)                                   | 117.6<br>(1 C)                                 | 100           | 69            | This work |
| P2-Na <sub>0.57</sub> Ni <sub>0.33</sub> Mn <sub>0.67</sub> O <sub>2</sub>                                        | 2.0-4.25          | 171.1<br>(0.1 C)                               | 25.8<br>(10 C)                                   | 141.3<br>(1 C)                                 | 100           | 40.1          | This work |
| O3-NaNi <sub>1/3</sub> Fe <sub>1/3</sub> Mn <sub>1/3</sub> O <sub>2</sub>                                         | 2.0-4.0           | ~131<br>(0.1 C)                                | ~82<br>(10 C)                                    | ~119<br>(1 C)                                  | 100           | 63            | 11        |
| O3/P2 Na <sub>0.88</sub> Ni <sub>0.45</sub> Mn <sub>0.55</sub> O <sub>2</sub>                                     | 2.0-4.0           | 127.2<br>(0.05 C)                              | ~78<br>(10 C)                                    | 106.7<br>(1 C)                                 | 250           | 71.1          | 15        |
| P2-Na <sub>0.78</sub> Al <sub>0.05</sub> Ni <sub>0.33</sub> Mn <sub>0.60</sub> O <sub>2</sub>                     | 2.0-4.5           | 123.9<br>(0.1 C)                               | 41.2<br>(5 C)                                    | 131<br>(0.1 C)                                 | 50            | 83.9          | 19        |
| P2-Na <sub>0.75</sub> Ca <sub>0.04</sub> [Li <sub>0.1</sub> Ni <sub>0.2</sub> Mn <sub>0.67</sub> ]O <sub>2</sub>  | 2.0-4.3           | 133.1<br>(0.1 C)                               | 68.8<br>(20 C)                                   | 136.9<br>(0.1C)                                | 50            | 94.2          | 27        |
| P2-Na <sub>0.67</sub> Ni <sub>0.15</sub> Fe <sub>0.2</sub> Mn <sub>0.65</sub> F <sub>0.05</sub> O <sub>1.95</sub> | 1.5-4.3           | 229<br>(0.1 C)                                 | 100<br>(10 C)                                    | ~229<br>(0.1 C)                                | 50            | 87.7          | 35        |
| P2-Na <sub>2/3</sub> [Ni <sub>0.3</sub> Co <sub>0.1</sub> Mn <sub>0.6</sub> ]O <sub>2</sub>                       | 2.0-4.3           | 161.6<br>(0.1 C)                               | ~90<br>(10 C)                                    | 161.6<br>(0.1 C)                               | 50            | 79.2          | 45        |
| P2-Na <sub>2/3</sub> [Ni <sub>1/3</sub> Mn <sub>2/3</sub> ]O <sub>2</sub>                                         | 2.3-4.5           | 134<br>(0.01 C)                                | None                                             | 134<br>(0.01 C)                                | 10            | 64            | 53        |
